# Supplementary material for: Suppression of homology-dependent DNA double-strand break repair induces PARP inhibitor sensitivity in VHL-deficient human renal cell carcinoma
Source: PubMed Central journal article supplement (PMC5797003; doi:10.18632/oncotarget.23470), 2017-12-19
Supplement: oncotarget-09-4647-s001.pdf [file oncotarget-09-4647-s001.pdf]

## Suppression of homology-dependent DNA double-strand break repair induces PARP inhibitor sensitivity in *VHL*-deficient human renal cell carcinoma

### SUPPLEMENTARY MATERIALS

#### Cell cycle analysis

Cells in log-phase growth at approximately 60% confluency were pulsed with 10  $\mu$ M BrdU for 20 minutes. Cells were immediately trypsinized, washed in 1X PBS, and fixed with 70% ethanol at  $-20^{\circ}\text{C}$  overnight. Cells were then incubated in 2 M HCl + 0.5% Triton X-100 for 30 minutes to denature DNA, neutralized with 0.1 M  $\text{Na}_2\text{B}_4\text{O}_7$  pH 8.5, washed with 1% BSA +

0.2% Triton X-100 in 1X PBS, and stained with FITC Mouse Anti-BrdU (BD Biosciences) at  $4^{\circ}\text{C}$  overnight. Finally, cells were washed with 1% BSA + 0.2% Triton X-100 in 1X PBS, incubated in PI/RNase Staining Buffer (BD Biosciences) for 15 minutes, and analyzed by flow cytometry on a FACSCalibur Cytometer (BD Biosciences). Data were analyzed using FlowJo software (Tree Star Inc.).

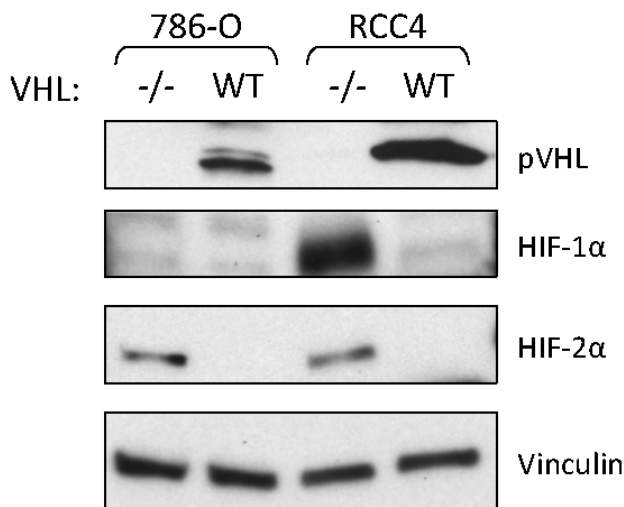

**Supplementary Figure 1: Validation of *VHL*<sup>-/-</sup> and *VHL*<sup>WT</sup>-complemented 786-O and RCC4 renal cell lines.** Western blotting was performed to analyze pVHL, HIF-1 $\alpha$ , and HIF-2 $\alpha$  expression in 786-O<sup>VHL<sup>-/-</sup></sup>, 786-O+VHL<sup>WT</sup>, RCC4<sup>VHL<sup>-/-</sup></sup>, and RCC4+VHL<sup>WT</sup> cells. Note that 786-O<sup>VHL<sup>-/-</sup></sup> cells overexpress HIF-2 $\alpha$  and RCC4<sup>VHL<sup>-/-</sup></sup> cells overexpress both HIF-1 $\alpha$  and HIF-2 $\alpha$ . Complementation with pVHL in 786-O+VHL<sup>WT</sup> and RCC4+VHL<sup>WT</sup> cells counteracts HIF-1 $\alpha$  and HIF-2 $\alpha$  overexpression.

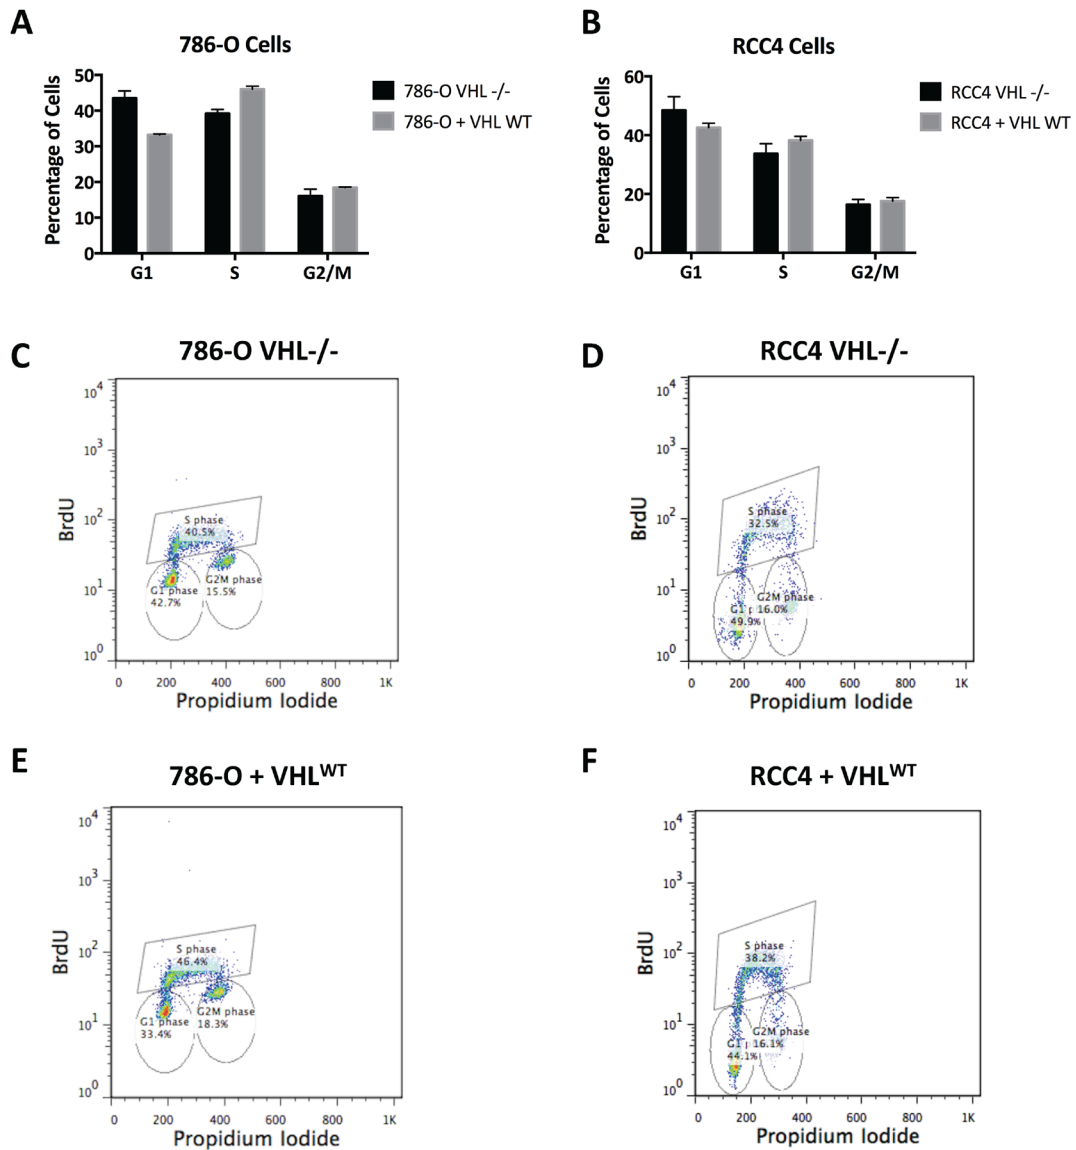

**Supplementary Figure 2: Cell cycle analysis in 786-O and RCC4 matched pair cell lines.** (A, B) Cell cycle distribution in 786-O<sup>VHL<sup>-/-</sup></sup> and 786-O+VHL<sup>WT</sup> cells or RCC4<sup>VHL<sup>-/-</sup></sup> and RCC4+VHL<sup>WT</sup> cells determined by analysis of PI/BrdU FACS plots. *Columns*, mean of 3 to 4 replicates; *bars*, SD. (C–F) Representative PI/BrdU FACS plots in 786-O<sup>VHL<sup>-/-</sup></sup>, 786-O+VHL<sup>WT</sup>, RCC4<sup>VHL<sup>-/-</sup></sup>, and RCC4+VHL<sup>WT</sup> cells.

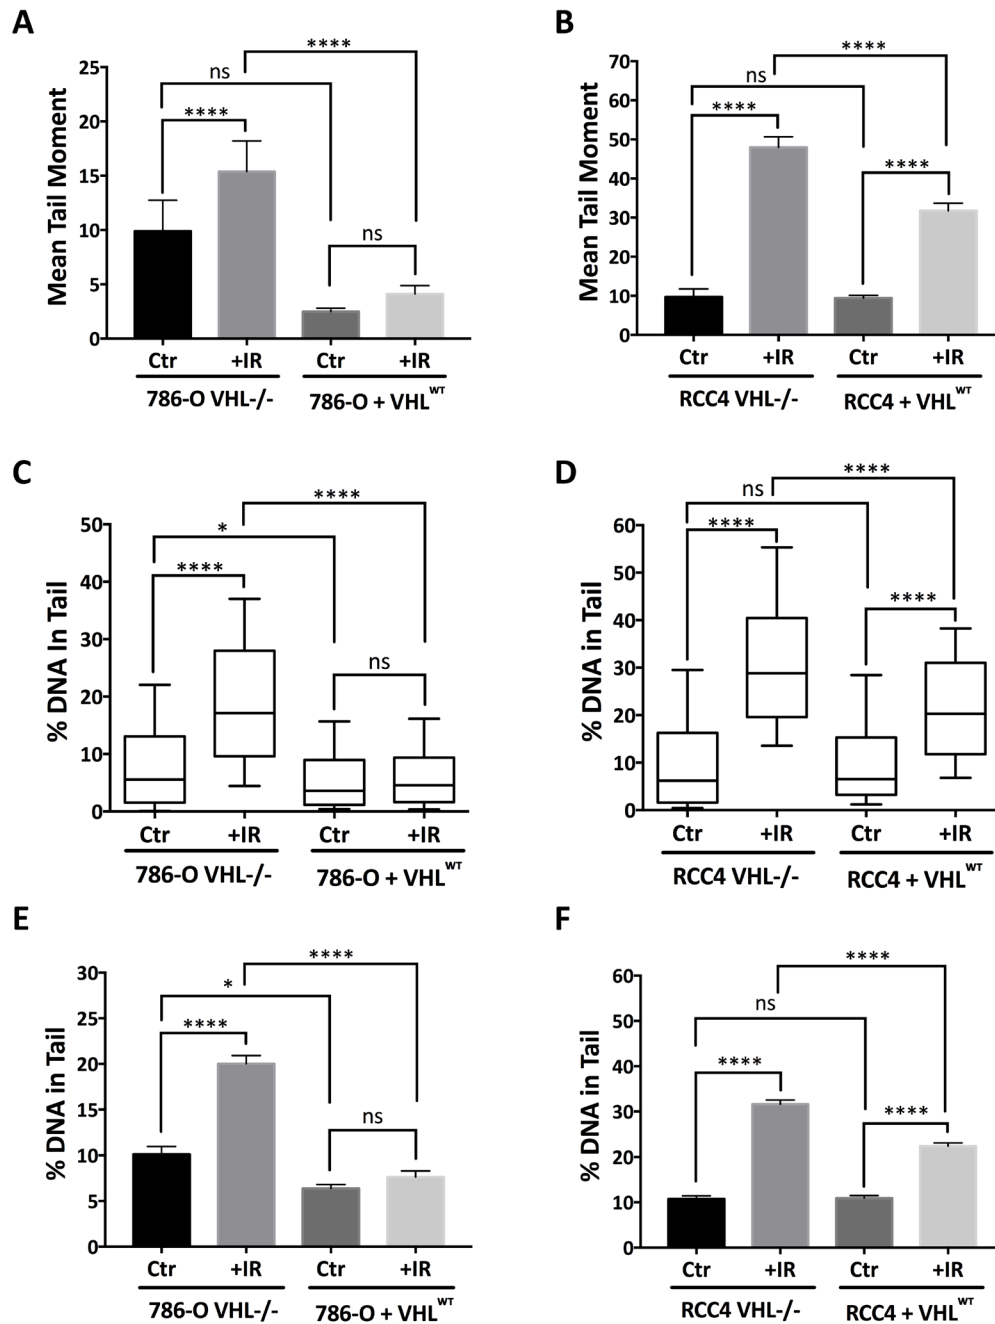

**Supplementary Figure 3: The neutral comet assay performed in 786-O and RCC4 matched pair cells 24 h post-treatment with 10 Gy IR (+IR) or mock treatment (Ctr).** (A, B) Mean comet tail moments from analysis of  $\geq 100$  comets/sample. Columns, mean; bars, SEM. (C, D) Median % DNA in the tail from analysis of  $\geq 100$  comets/sample presented as box-and-whisker plots. Boxes, lower and upper quartiles; middle line, median; whiskers, 10th to 90th percentiles. (E, F) Mean % DNA in the tail from analysis of  $\geq 100$  comets/sample. Columns, mean; bars, SEM. For all panels, \*\*\*\*significant at  $p < 0.0001$ ; \*significant at  $p < 0.05$ ; ns, not significant.
